# Supplementary material
Source: PubMed Central journal article supplement (PMC4407850)

SUPPLEMENTARY DATA

**Supplementary Figure 1. Metabolic responses to an exercise intervention initiated concurrently with high fat feeding were similar between genotypes.** NT and MCK-PGC1 $\alpha$  mice were housed individually with running wheels at the onset of a high fat diet for ten weeks. (A) Body weight and (B) food intake were similar between groups over the course of the experiment. (C) Glucose tolerance examined by i.p. glucose injections at the beginning (week 0) and end (week 10) of the study was comparable between genotypes. (D) Fasting plasma insulin levels measured at week 10 were similar between genotypes. (E) Voluntary running distance was similar between NT and MCK-PGC1 $\alpha$  mice. (F) Weight gain during the 10 week high fat diet correlated negatively with running distance. N=6-7 per group.

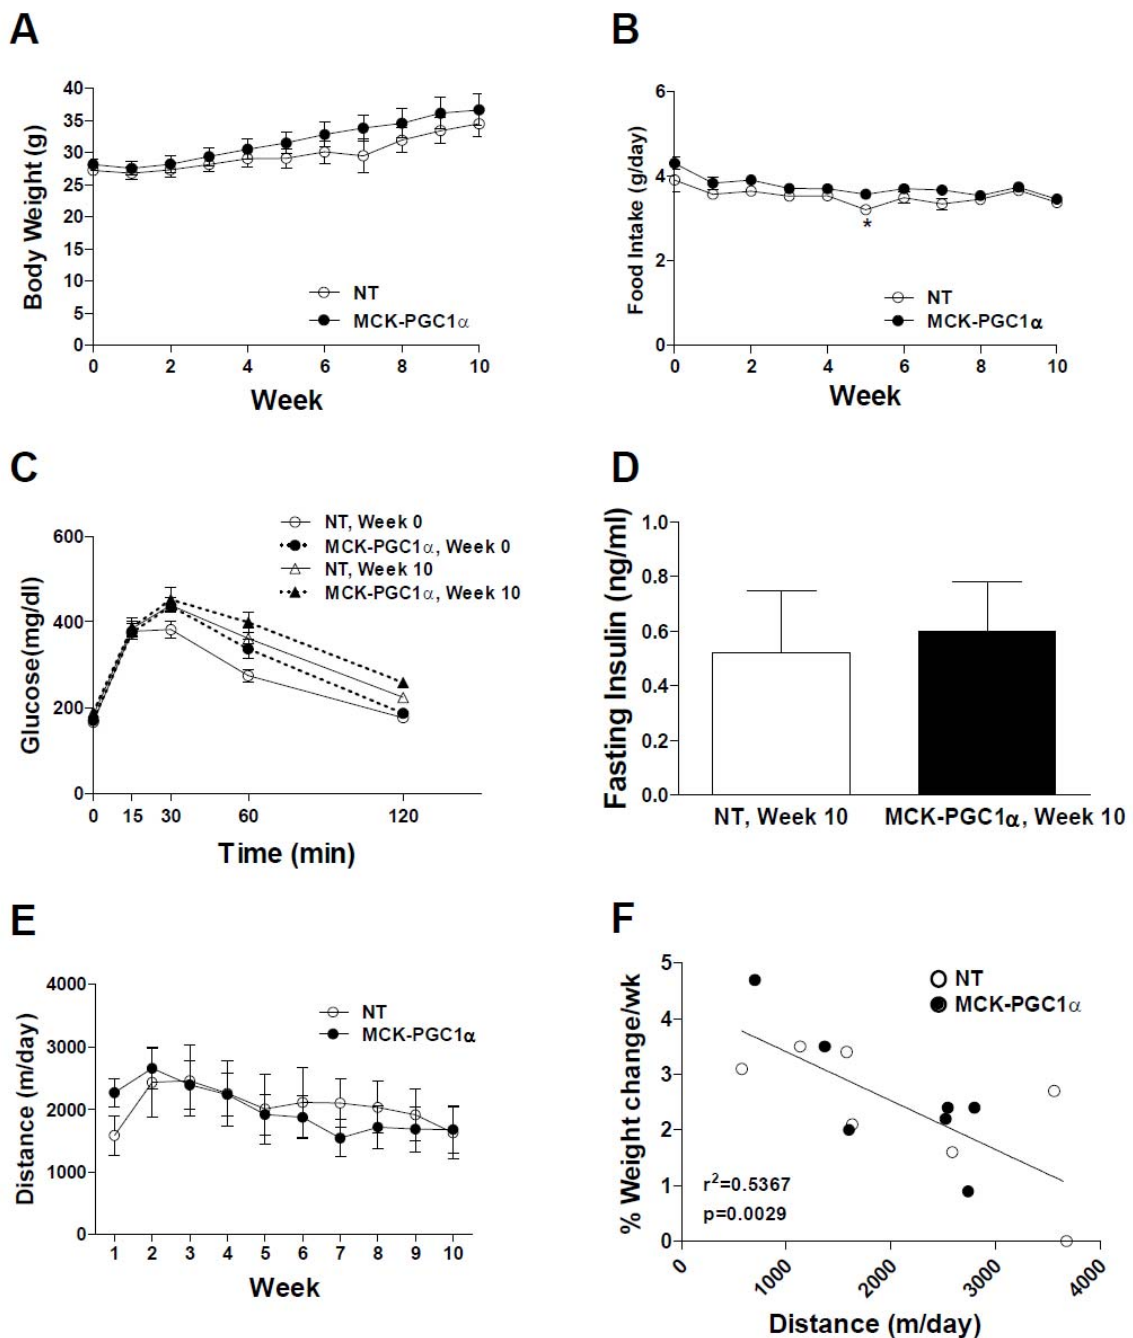

Supplement: supp_db14-0827_DB140827SupplementaryData.pdf [file supp_db14-0827_DB140827SupplementaryData.pdf]
